# Supplementary material for: Silica–PEG gel immobilization of mammalian cells
Source: Royal Society of Chemistry journal article supplement (doi:10.1039/c4tb00812j), 2014-01-01
Supplement: c4tb00812j1.pdf [file c4tb00812j1.pdf]

## Supplemental Data:

**Figure S.1.:** Live-Dead Analysis of encapsulated cells.

**Figure S.2.:** (A) Pictures and optical properties of THEOS-PEG gels prepared with different PEG concentrations using (B) 2 kDa 4-arm PEG, and (C) 0.6 kDa linear PEG. Drop in transmittance observed at all compositions at 560 nm is due to absorbance by cell culture media.

**Figure S.3.:** Time-lapse images of encapsulated HFF cells over time showing complete inhibition of proliferation

**Table S.1.:** Changes in asymmetric stretching vibrations of IR spectra during encapsulation.

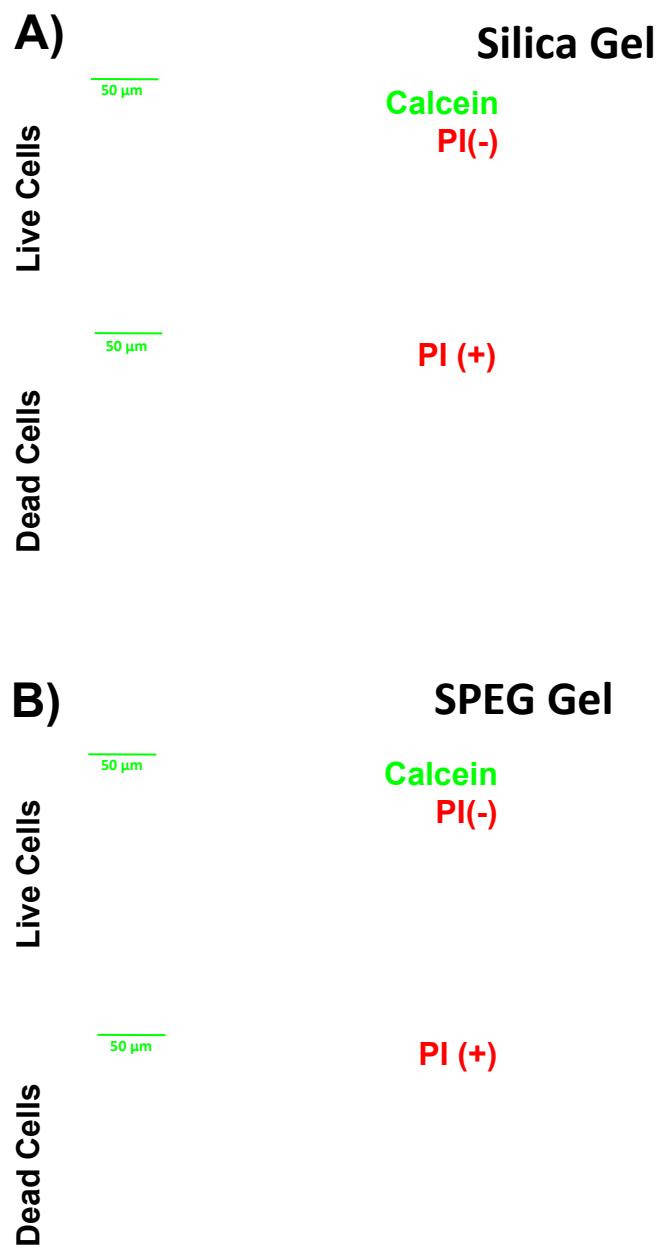

Figure S.1., Reategui et al.

**A)**

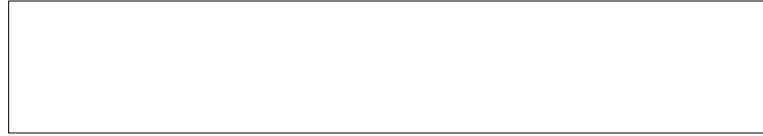

**B)**

2kDa 4-arm PEG

**C)**

0.6kDa linear PEG
